# Supplementary material
Source: Springer Nature journal article supplement (https://www.springermedizin.de/resource/supplementary/12943_2004_80_MOESM6_ESM.pdf/9553390)

### 5A Su(Fu) protein

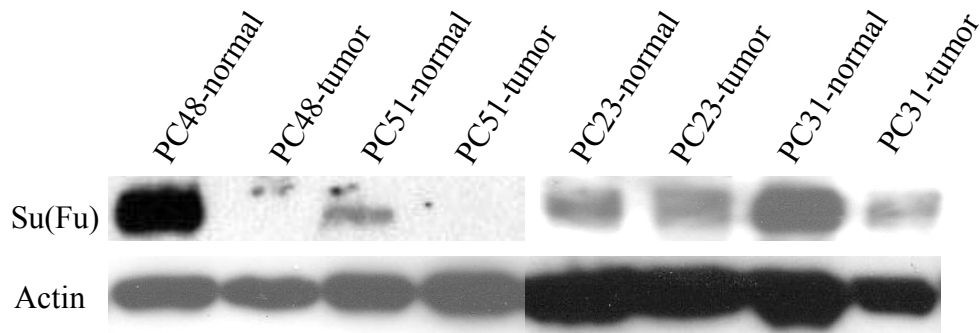

### 5B Mutation of Su(Fu) in PC48

#### Wt Su(Fu)

ACC GAA GAG TTT GTA GAG AAA A  
**TGG CTT CTC AAA CAT CTC TTT T**  
 Thr Glu Glu Phe Val Glu Lys

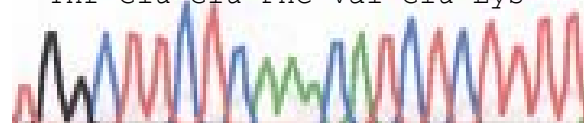

#### Mutant Su(Fu)

ACC GAA GAG TTG TAG AGA AAA  
**TGG CTT CTC AAC ATC TCT TTT**  
 Thr Glu Glu Phe Stop X X

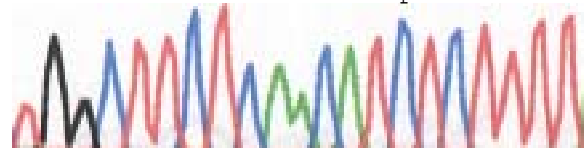

### 5C

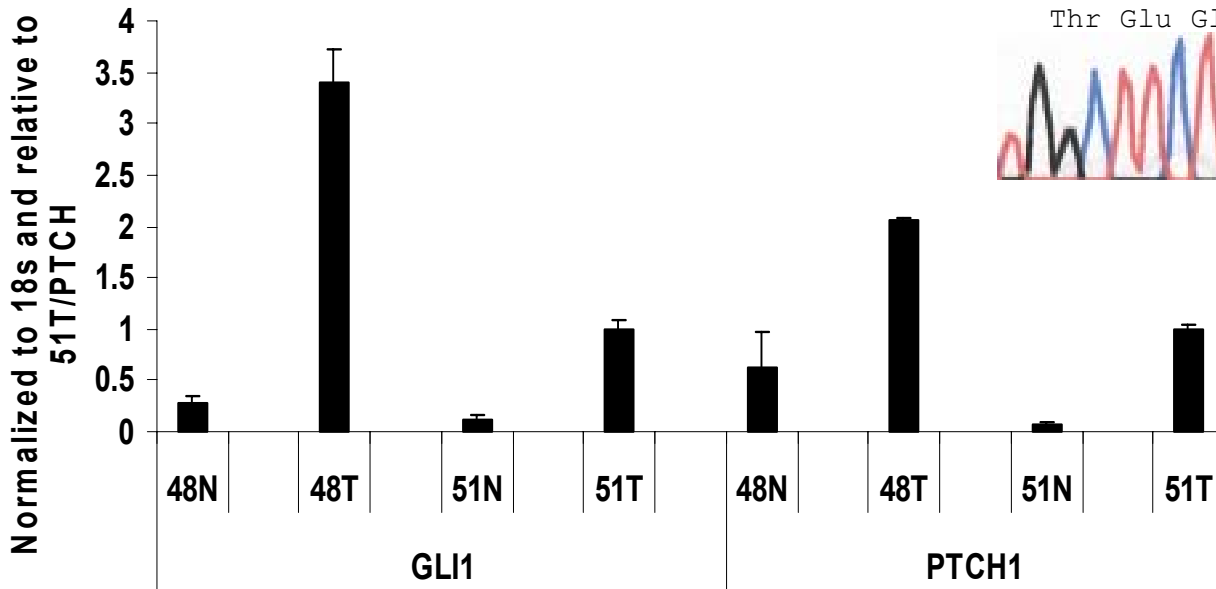

Supplement: MOESM6 [file 9553390]
